# Supplementary material for: Circulating MicroRNAs as Novel Potential Biomarkers for Left Ventricular Remodeling in Postinfarction Heart Failure
Source: PubMed Central journal article supplement (PMC6914954; doi:10.1155/2019/5093803), 2019-12-02
Supplement: 5093803.f1.pdf [file 5093803.f1.pdf]

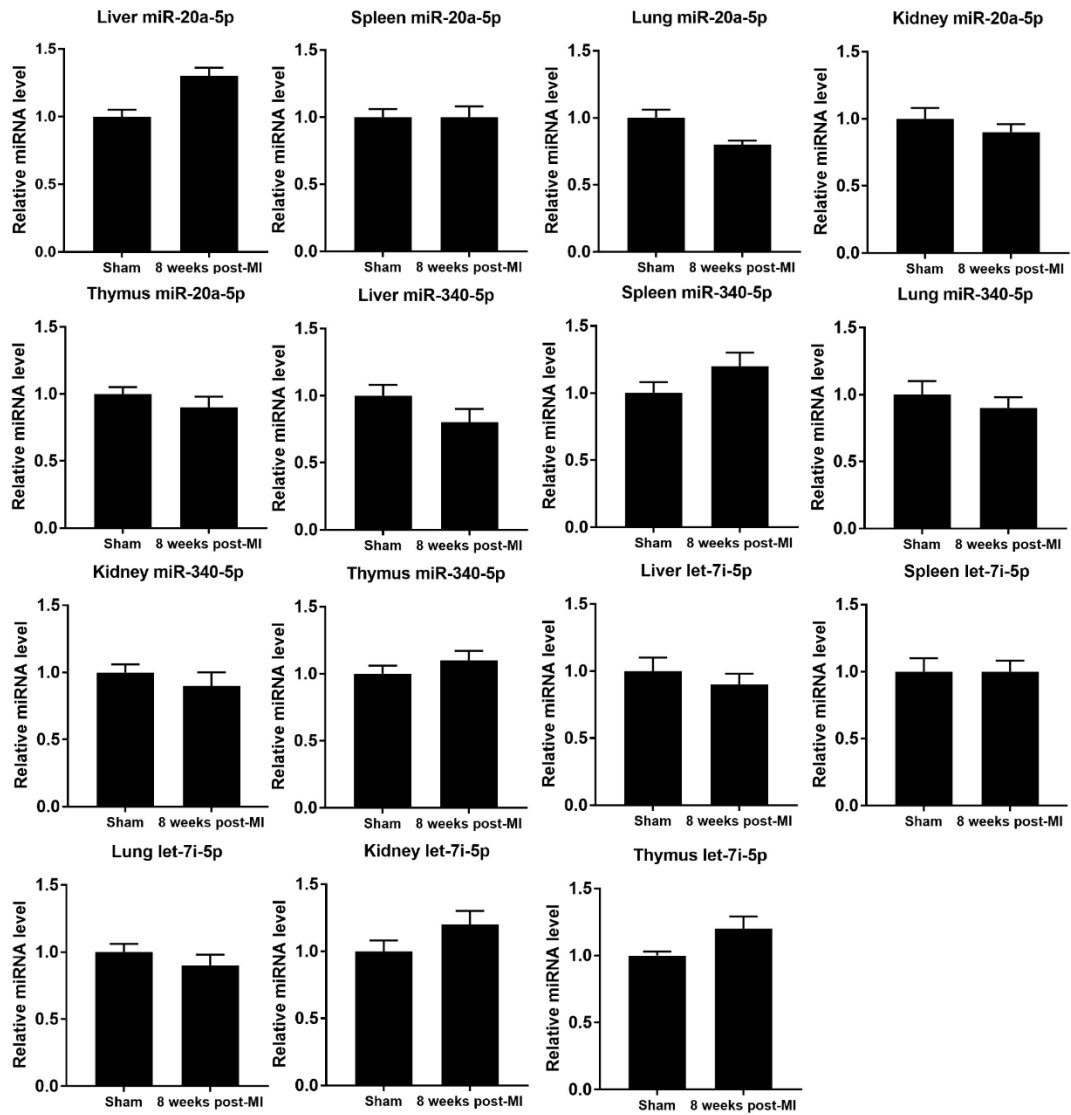

Figure S1: Expression levels of miR-20a-5p, miR-340-5p, and let-7i-5p in liver, spleen, lung, kidney and thymus tissues in the 8 weeks post-MI group and the sham group. There was no significant difference in the miR-20a-5p, miR-340-5p, and let-7i-5p levels in liver, spleen, lung, kidney and thymus tissues between the 8 weeks post-MI group and the sham group. MI, myocardial infarction.

Table S1: The KEGG annotation results of the 19 common target genes.

| Pathway                                    | ID       | Input                                 | Hyperlink                                                                                                                                                                                 |
|--------------------------------------------|----------|---------------------------------------|-------------------------------------------------------------------------------------------------------------------------------------------------------------------------------------------|
| Circadian rhythm                           | rno04710 | ENSRNOG00000007387 ENSRNOG00000020836 | <a href="http://www.genome.jp/kegg-bin/show_pathway?rno04710/rno:287422%09red/rno:368158%09red">http://www.genome.jp/kegg-bin/show_pathway?rno04710/rno:287422%09red/rno:368158%09red</a> |
| Circadian entrainment                      | rno04713 | ENSRNOG00000007387 ENSRNOG00000005369 | <a href="http://www.genome.jp/kegg-bin/show_pathway?rno04713/rno:50599%09red/rno:287422%09red">http://www.genome.jp/kegg-bin/show_pathway?rno04713/rno:50599%09red/rno:287422%09red</a>   |
| Herpes simplex infection                   | rno05168 | ENSRNOG00000007387 ENSRNOG00000007390 | <a href="http://www.genome.jp/kegg-bin/show_pathway?rno05168/rno:287422%09red/rno:25493%09red">http://www.genome.jp/kegg-bin/show_pathway?rno05168/rno:287422%09red/rno:25493%09red</a>   |
| Butanoate metabolism                       | rno00650 | ENSRNOG00000001770                    | <a href="http://www.genome.jp/kegg-bin/show_pathway?rno00650/rno:171142%09red">http://www.genome.jp/kegg-bin/show_pathway?rno00650/rno:171142%09red</a>                                   |
| beta-Alanine metabolism                    | rno00410 | ENSRNOG00000001770                    | <a href="http://www.genome.jp/kegg-bin/show_pathway?rno00410/rno:171142%09red">http://www.genome.jp/kegg-bin/show_pathway?rno00410/rno:171142%09red</a>                                   |
| Propanoate metabolism                      | rno00640 | ENSRNOG00000001770                    | <a href="http://www.genome.jp/kegg-bin/show_pathway?rno00640/rno:171142%09red">http://www.genome.jp/kegg-bin/show_pathway?rno00640/rno:171142%09red</a>                                   |
| Linoleic acid metabolism                   | rno00591 | ENSRNOG00000012458                    | <a href="http://www.genome.jp/kegg-bin/show_pathway?rno00591/rno:25086%09red">http://www.genome.jp/kegg-bin/show_pathway?rno00591/rno:25086%09red</a>                                     |
| Tryptophan metabolism                      | rno00380 | ENSRNOG00000001770                    | <a href="http://www.genome.jp/kegg-bin/show_pathway?rno00380/rno:171142%09red">http://www.genome.jp/kegg-bin/show_pathway?rno00380/rno:171142%09red</a>                                   |
| Fatty acid degradation                     | rno00071 | ENSRNOG00000001770                    | <a href="http://www.genome.jp/kegg-bin/show_pathway?rno00071/rno:171142%09red">http://www.genome.jp/kegg-bin/show_pathway?rno00071/rno:171142%09red</a>                                   |
| Lysine degradation                         | rno00310 | ENSRNOG00000001770                    | <a href="http://www.genome.jp/kegg-bin/show_pathway?rno00310/rno:171142%09red">http://www.genome.jp/kegg-bin/show_pathway?rno00310/rno:171142%09red</a>                                   |
| Fatty acid metabolism                      | rno01212 | ENSRNOG00000001770                    | <a href="http://www.genome.jp/kegg-bin/show_pathway?rno01212/rno:171142%09red">http://www.genome.jp/kegg-bin/show_pathway?rno01212/rno:171142%09red</a>                                   |
| Valine, leucine and isoleucine degradation | rno00280 | ENSRNOG00000001770                    | <a href="http://www.genome.jp/kegg-bin/show_pathway?rno00280/rno:171142%09red">http://www.genome.jp/kegg-bin/show_pathway?rno00280/rno:171142%09red</a>                                   |
| Cytosolic DNA-sensing pathway              | rno04623 | ENSRNOG00000007390                    | <a href="http://www.genome.jp/kegg-bin/show_pathway?rno04623/rno:25493%09red">http://www.genome.jp/kegg-bin/show_pathway?rno04623/rno:25493%09red</a>                                     |
| Legionellosis                              | rno05134 | ENSRNOG00000007390                    | <a href="http://www.genome.jp/kegg-bin/show_pathway?rno05134/rno:25493%09red">http://www.genome.jp/kegg-bin/show_pathway?rno05134/rno:25493%09red</a>                                     |
| NOD-like receptor signaling pathway        | rno04621 | ENSRNOG00000007390                    | <a href="http://www.genome.jp/kegg-bin/show_pathway?rno04621/rno:25493%09red">http://www.genome.jp/kegg-bin/show_pathway?rno04621/rno:25493%09red</a>                                     |
| RIG-I-like receptor signaling pathway      | rno04622 | ENSRNOG00000007390                    | <a href="http://www.genome.jp/kegg-bin/show_pathway?rno04622/rno:25493%09red">http://www.genome.jp/kegg-bin/show_pathway?rno04622/rno:25493%09red</a>                                     |
| Amphetamine addiction                      | rno05031 | ENSRNOG00000043465                    | <a href="http://www.genome.jp/kegg-bin/show_pathway?rno05031/rno:54323%09red">http://www.genome.jp/kegg-bin/show_pathway?rno05031/rno:54323%09red</a>                                     |

---

|                                              |          |                    |                                                                                                                                                         |
|----------------------------------------------|----------|--------------------|---------------------------------------------------------------------------------------------------------------------------------------------------------|
| Inflammatory bowel disease (IBD)             | rno05321 | ENSRNOG00000020836 | <a href="http://www.genome.jp/kegg-bin/show_pathway?rno05321/rno:368158%09red">http://www.genome.jp/kegg-bin/show_pathway?rno05321/rno:368158%09red</a> |
| Metabolism of xenobiotics by cytochrome P450 | rno00980 | ENSRNOG00000012458 | <a href="http://www.genome.jp/kegg-bin/show_pathway?rno00980/rno:25086%09red">http://www.genome.jp/kegg-bin/show_pathway?rno00980/rno:25086%09red</a>   |
| p53 signaling pathway                        | rno04115 | ENSRNOG0000000302  | <a href="http://www.genome.jp/kegg-bin/show_pathway?rno04115/rno:294518%09red">http://www.genome.jp/kegg-bin/show_pathway?rno04115/rno:294518%09red</a> |
| Drug metabolism - cytochrome P450            | rno00982 | ENSRNOG00000012458 | <a href="http://www.genome.jp/kegg-bin/show_pathway?rno00982/rno:25086%09red">http://www.genome.jp/kegg-bin/show_pathway?rno00982/rno:25086%09red</a>   |
| Steroid hormone biosynthesis                 | rno00140 | ENSRNOG00000012458 | <a href="http://www.genome.jp/kegg-bin/show_pathway?rno00140/rno:25086%09red">http://www.genome.jp/kegg-bin/show_pathway?rno00140/rno:25086%09red</a>   |
| Leishmaniasis                                | rno05140 | ENSRNOG00000007390 | <a href="http://www.genome.jp/kegg-bin/show_pathway?rno05140/rno:25493%09red">http://www.genome.jp/kegg-bin/show_pathway?rno05140/rno:25493%09red</a>   |
| Arachidonic acid metabolism                  | rno00590 | ENSRNOG00000012458 | <a href="http://www.genome.jp/kegg-bin/show_pathway?rno00590/rno:25086%09red">http://www.genome.jp/kegg-bin/show_pathway?rno00590/rno:25086%09red</a>   |
| B cell receptor signaling pathway            | rno04662 | ENSRNOG00000007390 | <a href="http://www.genome.jp/kegg-bin/show_pathway?rno04662/rno:25493%09red">http://www.genome.jp/kegg-bin/show_pathway?rno04662/rno:25493%09red</a>   |
| Adipocytokine signaling pathway              | rno04920 | ENSRNOG00000007390 | <a href="http://www.genome.jp/kegg-bin/show_pathway?rno04920/rno:25493%09red">http://www.genome.jp/kegg-bin/show_pathway?rno04920/rno:25493%09red</a>   |
| Chronic myeloid leukemia                     | rno05220 | ENSRNOG00000007390 | <a href="http://www.genome.jp/kegg-bin/show_pathway?rno05220/rno:25493%09red">http://www.genome.jp/kegg-bin/show_pathway?rno05220/rno:25493%09red</a>   |
| PPAR signaling pathway                       | rno03320 | ENSRNOG00000001770 | <a href="http://www.genome.jp/kegg-bin/show_pathway?rno03320/rno:171142%09red">http://www.genome.jp/kegg-bin/show_pathway?rno03320/rno:171142%09red</a> |
| Chemical carcinogenesis                      | rno05204 | ENSRNOG00000012458 | <a href="http://www.genome.jp/kegg-bin/show_pathway?rno05204/rno:25086%09red">http://www.genome.jp/kegg-bin/show_pathway?rno05204/rno:25086%09red</a>   |
| Small cell lung cancer                       | rno05222 | ENSRNOG00000007390 | <a href="http://www.genome.jp/kegg-bin/show_pathway?rno05222/rno:25493%09red">http://www.genome.jp/kegg-bin/show_pathway?rno05222/rno:25493%09red</a>   |
| Glucagon signaling pathway                   | rno04922 | ENSRNOG00000001189 | <a href="http://www.genome.jp/kegg-bin/show_pathway?rno04922/rno:59329%09red">http://www.genome.jp/kegg-bin/show_pathway?rno04922/rno:59329%09red</a>   |
| Prostate cancer                              | rno05215 | ENSRNOG00000007390 | <a href="http://www.genome.jp/kegg-bin/show_pathway?rno05215/rno:25493%09red">http://www.genome.jp/kegg-bin/show_pathway?rno05215/rno:25493%09red</a>   |
| Peroxisome                                   | rno04146 | ENSRNOG00000001770 | <a href="http://www.genome.jp/kegg-bin/show_pathway?rno04146/rno:171142%09red">http://www.genome.jp/kegg-bin/show_pathway?rno04146/rno:171142%09red</a> |
| NF-kappa B signaling pathway                 | rno04064 | ENSRNOG00000007390 | <a href="http://www.genome.jp/kegg-bin/show_pathway?rno04064/rno:25493%09red">http://www.genome.jp/kegg-bin/show_pathway?rno04064/rno:25493%09red</a>   |

---

---

|                                           |          |                     |                                                                                                                                                         |
|-------------------------------------------|----------|---------------------|---------------------------------------------------------------------------------------------------------------------------------------------------------|
| Longevity regulating pathway              | rno04211 | ENSRNOG00000000302  | <a href="http://www.genome.jp/kegg-bin/show_pathway?rno04211/rno:294518%09red">http://www.genome.jp/kegg-bin/show_pathway?rno04211/rno:294518%09red</a> |
| Morphine addiction                        | rno05032 | ENSRNOG000000005369 | <a href="http://www.genome.jp/kegg-bin/show_pathway?rno05032/rno:50599%09red">http://www.genome.jp/kegg-bin/show_pathway?rno05032/rno:50599%09red</a>   |
| Estrogen signaling pathway                | rno04915 | ENSRNOG000000005369 | <a href="http://www.genome.jp/kegg-bin/show_pathway?rno04915/rno:50599%09red">http://www.genome.jp/kegg-bin/show_pathway?rno04915/rno:50599%09red</a>   |
| Toll-like receptor signaling pathway      | rno04620 | ENSRNOG000000007390 | <a href="http://www.genome.jp/kegg-bin/show_pathway?rno04620/rno:25493%09red">http://www.genome.jp/kegg-bin/show_pathway?rno04620/rno:25493%09red</a>   |
| Retrograde endocannabinoid signaling      | rno04723 | ENSRNOG000000005369 | <a href="http://www.genome.jp/kegg-bin/show_pathway?rno04723/rno:50599%09red">http://www.genome.jp/kegg-bin/show_pathway?rno04723/rno:50599%09red</a>   |
| Chagas disease (American trypanosomiasis) | rno05142 | ENSRNOG000000007390 | <a href="http://www.genome.jp/kegg-bin/show_pathway?rno05142/rno:25493%09red">http://www.genome.jp/kegg-bin/show_pathway?rno05142/rno:25493%09red</a>   |
| T cell receptor signaling pathway         | rno04660 | ENSRNOG000000007390 | <a href="http://www.genome.jp/kegg-bin/show_pathway?rno04660/rno:25493%09red">http://www.genome.jp/kegg-bin/show_pathway?rno04660/rno:25493%09red</a>   |
| Insulin resistance                        | rno04931 | ENSRNOG000000007390 | <a href="http://www.genome.jp/kegg-bin/show_pathway?rno04931/rno:25493%09red">http://www.genome.jp/kegg-bin/show_pathway?rno04931/rno:25493%09red</a>   |
| Cholinergic synapse                       | rno04725 | ENSRNOG000000005369 | <a href="http://www.genome.jp/kegg-bin/show_pathway?rno04725/rno:50599%09red">http://www.genome.jp/kegg-bin/show_pathway?rno04725/rno:50599%09red</a>   |
| TNF signaling pathway                     | rno04668 | ENSRNOG000000007390 | <a href="http://www.genome.jp/kegg-bin/show_pathway?rno04668/rno:25493%09red">http://www.genome.jp/kegg-bin/show_pathway?rno04668/rno:25493%09red</a>   |
| Glutamatergic synapse                     | rno04724 | ENSRNOG000000005369 | <a href="http://www.genome.jp/kegg-bin/show_pathway?rno04724/rno:50599%09red">http://www.genome.jp/kegg-bin/show_pathway?rno04724/rno:50599%09red</a>   |
| Carbon metabolism                         | rno01200 | ENSRNOG00000001770  | <a href="http://www.genome.jp/kegg-bin/show_pathway?rno01200/rno:171142%09red">http://www.genome.jp/kegg-bin/show_pathway?rno01200/rno:171142%09red</a> |
| Toxoplasmosis                             | rno05145 | ENSRNOG000000007390 | <a href="http://www.genome.jp/kegg-bin/show_pathway?rno05145/rno:25493%09red">http://www.genome.jp/kegg-bin/show_pathway?rno05145/rno:25493%09red</a>   |
| Serotonergic synapse                      | rno04726 | ENSRNOG000000005369 | <a href="http://www.genome.jp/kegg-bin/show_pathway?rno04726/rno:50599%09red">http://www.genome.jp/kegg-bin/show_pathway?rno04726/rno:50599%09red</a>   |
| Neurotrophin signaling pathway            | rno04722 | ENSRNOG000000007390 | <a href="http://www.genome.jp/kegg-bin/show_pathway?rno04722/rno:25493%09red">http://www.genome.jp/kegg-bin/show_pathway?rno04722/rno:25493%09red</a>   |
| Dopaminergic synapse                      | rno04728 | ENSRNOG000000005369 | <a href="http://www.genome.jp/kegg-bin/show_pathway?rno04728/rno:50599%09red">http://www.genome.jp/kegg-bin/show_pathway?rno04728/rno:50599%09red</a>   |
| Hepatitis C                               | rno05160 | ENSRNOG000000007390 | <a href="http://www.genome.jp/kegg-bin/show_pathway?rno05160/rno:25493%09red">http://www.genome.jp/kegg-bin/show_pathway?rno05160/rno:25493%09red</a>   |
| Measles                                   | rno05162 | ENSRNOG000000007390 | <a href="http://www.genome.jp/kegg-bin/show_pathway?rno05162/rno:25493%09red">http://www.genome.jp/kegg-bin/show_pathway?rno05162/rno:25493%09red</a>   |
| Osteoclast differentiation                | rno04380 | ENSRNOG000000007390 | <a href="http://www.genome.jp/kegg-bin/show_pathway?rno04380/rno:25493%09red">http://www.genome.jp/kegg-bin/show_pathway?rno04380/rno:25493%09red</a>   |

---

---

|                                           |          |                                       |                                                                                                                                                                                         |
|-------------------------------------------|----------|---------------------------------------|-----------------------------------------------------------------------------------------------------------------------------------------------------------------------------------------|
| Apoptosis                                 | rno04210 | ENSRNOG00000007390                    | <a href="http://www.genome.jp/kegg-bin/show_pathway?rno04210/rno:25493%09red">http://www.genome.jp/kegg-bin/show_pathway?rno04210/rno:25493%09red</a>                                   |
| Hepatitis B                               | rno05161 | ENSRNOG00000007390                    | <a href="http://www.genome.jp/kegg-bin/show_pathway?rno05161/rno:25493%09red">http://www.genome.jp/kegg-bin/show_pathway?rno05161/rno:25493%09red</a>                                   |
| Non-alcoholic fatty liver disease (NAFLD) | rno04932 | ENSRNOG00000012458                    | <a href="http://www.genome.jp/kegg-bin/show_pathway?rno04932/rno:25086%09red">http://www.genome.jp/kegg-bin/show_pathway?rno04932/rno:25086%09red</a>                                   |
| Oxytocin signaling pathway                | rno04921 | ENSRNOG00000005369                    | <a href="http://www.genome.jp/kegg-bin/show_pathway?rno04921/rno:50599%09red">http://www.genome.jp/kegg-bin/show_pathway?rno04921/rno:50599%09red</a>                                   |
| mTOR signaling pathway                    | rno04150 | ENSRNOG00000057078                    | <a href="http://www.genome.jp/kegg-bin/show_pathway?rno04150/rno:140942%09red">http://www.genome.jp/kegg-bin/show_pathway?rno04150/rno:140942%09red</a>                                 |
| Influenza A                               | rno05164 | ENSRNOG00000007390                    | <a href="http://www.genome.jp/kegg-bin/show_pathway?rno05164/rno:25493%09red">http://www.genome.jp/kegg-bin/show_pathway?rno05164/rno:25493%09red</a>                                   |
| Chemokine signaling pathway               | rno04062 | ENSRNOG00000007390                    | <a href="http://www.genome.jp/kegg-bin/show_pathway?rno04062/rno:25493%09red">http://www.genome.jp/kegg-bin/show_pathway?rno04062/rno:25493%09red</a>                                   |
| cAMP signaling pathway                    | rno04024 | ENSRNOG00000007390                    | <a href="http://www.genome.jp/kegg-bin/show_pathway?rno04024/rno:25493%09red">http://www.genome.jp/kegg-bin/show_pathway?rno04024/rno:25493%09red</a>                                   |
| Viral carcinogenesis                      | rno05203 | ENSRNOG00000007390                    | <a href="http://www.genome.jp/kegg-bin/show_pathway?rno05203/rno:25493%09red">http://www.genome.jp/kegg-bin/show_pathway?rno05203/rno:25493%09red</a>                                   |
| Epstein-Barr virus infection              | rno05169 | ENSRNOG00000007390                    | <a href="http://www.genome.jp/kegg-bin/show_pathway?rno05169/rno:25493%09red">http://www.genome.jp/kegg-bin/show_pathway?rno05169/rno:25493%09red</a>                                   |
| MicroRNAs in cancer                       | rno05206 | ENSRNOG00000057078                    | <a href="http://www.genome.jp/kegg-bin/show_pathway?rno05206/rno:140942%09red">http://www.genome.jp/kegg-bin/show_pathway?rno05206/rno:140942%09red</a>                                 |
| HTLV-I infection                          | rno05166 | ENSRNOG00000007390                    | <a href="http://www.genome.jp/kegg-bin/show_pathway?rno05166/rno:25493%09red">http://www.genome.jp/kegg-bin/show_pathway?rno05166/rno:25493%09red</a>                                   |
| PI3K-Akt signaling pathway                | rno04151 | ENSRNOG00000057078                    | <a href="http://www.genome.jp/kegg-bin/show_pathway?rno04151/rno:140942%09red">http://www.genome.jp/kegg-bin/show_pathway?rno04151/rno:140942%09red</a>                                 |
| Pathways in cancer                        | rno05200 | ENSRNOG00000007390                    | <a href="http://www.genome.jp/kegg-bin/show_pathway?rno05200/rno:25493%09red">http://www.genome.jp/kegg-bin/show_pathway?rno05200/rno:25493%09red</a>                                   |
| Metabolic pathways                        | rno01100 | ENSRNOG00000012458 ENSRNOG00000001770 | <a href="http://www.genome.jp/kegg-bin/show_pathway?rno01100/rno:171142%09red/rno:25086%09red">http://www.genome.jp/kegg-bin/show_pathway?rno01100/rno:171142%09red/rno:25086%09red</a> |

---
